# Supplementary material for: Enhancement of Nutritional Substance, Trace Elements, and Pigments in Waxy Maize Grains through Foliar Application of Selenite
Source: MDPI journal article supplement (doi:10.3390/foods13091337), 2024-04-26
Supplement: s1 [file s1]

Table 1. The correlation matrix eigenvalues and corresponding matrix eigenvectors of nutritional quality, trace elements and pigment content traits of maize kernels in 2019

| Primary Component          |               | Principal Component Number |        |        |        |        |        |
|----------------------------|---------------|----------------------------|--------|--------|--------|--------|--------|
|                            |               | 1                          | 2      | 3      | 4      | 5      | 6      |
| Eigenvalue                 |               | 6.645                      | 3.562  | 1.968  | 1.214  | 0.754  | 0.475  |
| Percentage of variance (%) |               | 41.532                     | 22.260 | 12.299 | 7.586  | 4.714  | 2.969  |
| Cumulative (%)             |               | 41.532                     | 63.792 | 76.090 | 83.676 | 88.391 | 91.360 |
| Load factor                | Soluble sugar | -0.281                     | 0.328  | 0.029  | 0.141  | 0.146  | -0.088 |
|                            | Sucrose       | -0.279                     | 0.316  | 0.087  | 0.245  | -0.029 | -0.002 |
|                            | Vitamin C     | 0.332                      | 0.014  | 0.265  | 0.008  | -0.143 | -0.087 |
|                            | Protein       | 0.301                      | 0.176  | 0.239  | 0.108  | 0.032  | -0.122 |
|                            | Lysine        | 0.132                      | 0.260  | 0.063  | -0.221 | 0.822  | 0.166  |
|                            | Fat           | 0.183                      | 0.216  | -0.335 | 0.216  | -0.289 | 0.691  |
|                            | Total starch  | 0.063                      | 0.458  | -0.009 | -0.372 | -0.202 | -0.085 |
|                            | Amylose       | 0.314                      | 0.112  | -0.150 | -0.220 | 0.100  | 0.190  |
|                            | Amylopectin   | 0.032                      | 0.463  | 0.007  | -0.362 | -0.220 | -0.108 |
|                            | Anthocyanin   | 0.317                      | -0.117 | 0.262  | 0.021  | -0.005 | 0.284  |
|                            | Carotenoid    | -0.268                     | 0.338  | -0.082 | 0.207  | -0.035 | 0.142  |
|                            | Fe            | 0.361                      | 0.007  | 0.011  | 0.058  | -0.036 | 0.040  |
|                            | Mn            | 0.259                      | 0.066  | -0.360 | 0.308  | 0.093  | -0.349 |
|                            | Cu            | 0.217                      | 0.133  | -0.385 | 0.393  | 0.193  | -0.194 |
|                            | Zn            | 0.263                      | 0.209  | 0.246  | 0.178  | -0.205 | -0.319 |
|                            | Se            | -0.043                     | 0.130  | 0.558  | 0.410  | 0.092  | 0.215  |

Table 2. The correlation matrix eigenvalues and corresponding matrix eigenvectors of nutritional quality, trace elements and pigment content traits of maize kernels in 2020

| Primary Component          |               | Principal Component Number |        |        |        |        |        |
|----------------------------|---------------|----------------------------|--------|--------|--------|--------|--------|
|                            |               | 1                          | 2      | 3      | 4      | 5      | 6      |
| Eigenvalue                 |               | 6.808                      | 4.051  | 2.137  | 1.024  | 0.541  | 0.511  |
| Percentage of variance (%) |               | 42.551                     | 25.321 | 13.359 | 6.402  | 3.382  | 3.195  |
| Cumulative (%)             |               | 42.551                     | 67.872 | 81.231 | 87.633 | 91.015 | 94.210 |
| Load factor                | Soluble sugar | -0.363                     | 0.120  | 0.074  | 0.072  | 0.137  | 0.049  |
|                            | Sucrose       | -0.342                     | 0.165  | 0.104  | 0.134  | 0.123  | 0.061  |
|                            | Vitamin C     | 0.304                      | 0.178  | -0.252 | 0.175  | 0.145  | 0.081  |
|                            | Protein       | 0.002                      | 0.387  | 0.107  | 0.060  | 0.152  | -0.790 |
|                            | Lysine        | 0.337                      | 0.166  | -0.061 | -0.104 | 0.067  | 0.067  |
|                            | Fat           | 0.081                      | 0.319  | 0.228  | 0.284  | -0.790 | 0.041  |
|                            | Total starch  | 0.052                      | 0.419  | 0.111  | -0.457 | 0.072  | 0.191  |
|                            | Amylose       | -0.324                     | 0.185  | 0.184  | -0.049 | 0.001  | 0.150  |
|                            | Amylopectin   | 0.107                      | 0.403  | 0.084  | -0.464 | 0.074  | 0.173  |
|                            | Anthocyanin   | 0.343                      | 0.098  | -0.173 | 0.144  | 0.082  | -0.085 |
|                            | Carotenoid    | -0.283                     | 0.277  | 0.104  | 0.155  | 0.002  | -0.106 |
|                            | Fe            | 0.205                      | 0.141  | 0.295  | 0.493  | 0.171  | 0.389  |
|                            | Mn            | 0.142                      | -0.151 | 0.526  | -0.132 | 0.081  | 0.120  |

|           |        |        |        |       |        |        |
|-----------|--------|--------|--------|-------|--------|--------|
| <b>Cu</b> | 0.164  | -0.127 | 0.520  | 0.163 | 0.379  | -0.135 |
| <b>Zn</b> | 0.339  | 0.172  | 0.022  | 0.040 | -0.054 | -0.102 |
| <b>Se</b> | -0.132 | 0.317  | -0.352 | 0.303 | 0.306  | 0.234  |

Table 3. The principal component scores of nutritional quality, trace elements and pigment content of maize grains in 2019.

| <b>2019</b> | <b>PC1</b> | <b>PC2</b> | <b>PC3</b> | <b>PC4</b> | <b>PC5</b> | <b>PC6</b> | <b>PC</b> | <b>Ranking</b> |
|-------------|------------|------------|------------|------------|------------|------------|-----------|----------------|
| <b>JS0</b>  | 0.201      | -1.682     | -0.142     | -0.688     | -0.277     | 0.764      | -0.351    | 8              |
| <b>JS1</b>  | 0.797      | -0.742     | -0.673     | -0.161     | 0.101      | -0.787     | 0.052     | 6              |
| <b>JS2</b>  | 1.291      | -0.075     | -1.300     | 0.882      | 0.745      | 0.045      | 0.463     | 2              |
| <b>JS3</b>  | 1.445      | 1.169      | 0.703      | -1.365     | -0.056     | 0.561      | 0.857     | 1              |
| <b>JS4</b>  | 0.592      | -0.755     | 2.038      | 0.939      | -0.494     | -0.323     | 0.367     | 3              |
| <b>CS0</b>  | -1.455     | -0.692     | -0.558     | -1.136     | 0.072      | -0.194     | -0.916    | 10             |
| <b>CS1</b>  | -0.810     | 0.226      | -0.400     | -0.335     | -0.473     | -0.387     | -0.394    | 9              |
| <b>CS2</b>  | -0.209     | 1.077      | -0.850     | 0.766      | -0.434     | -0.267     | 0.078     | 5              |
| <b>CS3</b>  | -0.604     | 1.310      | 0.259      | 0.411      | 0.162      | -0.369     | 0.101     | 4              |
| <b>CS4</b>  | -1.248     | 0.164      | 0.923      | 0.687      | 0.655      | 0.957      | -0.257    | 7              |

Table 4. The principal component scores of nutritional quality, trace elements and pigment content of maize grains in 2020.

| <b>2020</b> | <b>PC1</b> | <b>PC2</b> | <b>PC3</b> | <b>PC4</b> | <b>PC5</b> | <b>PC6</b> | <b>PC</b> | <b>Ranking</b> |
|-------------|------------|------------|------------|------------|------------|------------|-----------|----------------|
| <b>JS0</b>  | 0.726      | -1.131     | -0.945     | -0.776     | -0.639     | -0.551     | -0.192    | 7              |
| <b>JS1</b>  | 0.944      | -0.928     | 0.446      | 0.170      | 0.436      | 0.407      | 0.265     | 4              |
| <b>JS2</b>  | 1.146      | -0.299     | 0.970      | 1.005      | 0.088      | -0.096     | 0.606     | 2              |
| <b>JS3</b>  | 1.127      | 1.542      | 0.363      | -1.586     | -0.717     | 0.018      | 0.793     | 1              |
| <b>JS4</b>  | 0.864      | 0.615      | -1.589     | 1.204      | 0.628      | 0.045      | 0.411     | 3              |
| <b>CS0</b>  | -1.092     | -1.236     | -0.342     | -0.571     | -0.868     | -0.153     | -0.894    | 10             |
| <b>CS1</b>  | -0.847     | -0.692     | 0.587      | -0.308     | 0.331      | 0.080      | -0.463    | 9              |
| <b>CS2</b>  | -0.690     | 0.056      | 1.181      | 0.471      | 0.802      | 0.559      | -0.047    | 6              |
| <b>CS3</b>  | -0.954     | 1.255      | 0.757      | 0.114      | -0.246     | -1.170     | -0.025    | 5              |
| <b>CS4</b>  | -1.224     | 0.817      | -1.429     | 0.276      | 0.185      | 0.861      | -0.453    | 8              |
